# Supplementary material
Source: PubMed Central journal article supplement (PMC1369290)
Supplement: nar_34_3_e25__1.pdf [file nar_34_3_e25__1.pdf]

# High throughput trapping of secretory pathway genes in mouse embryonic stem cells

## Supplementary Information

Silke De-Zolt<sup>1\*</sup>, Frank Schnütgen<sup>1\*</sup>, Claudia Seisenberger<sup>2\*</sup>, Jens Hansen<sup>2\*</sup>, Melanie Hollatz<sup>2\*</sup>,  
Thomas Floss<sup>2\*</sup>, Patricia Ruiz<sup>3\*</sup>, Wolfgang Wurst<sup>2\*</sup>, and Harald von Melchner<sup>1\*§</sup>

<sup>1</sup>Department of Molecular Hematology, University of Frankfurt Medical School, Frankfurt am Main, Germany, <sup>2</sup>Institute of Developmental Genetics, GSF-National Research Center for Environment and Health, Neuherberg, Germany, <sup>3</sup>Center for Cardiovascular Research, Charité Universitätsmedizin and Department of Vertebrate Genomics, Max-Planck Institute for Molecular Genetics, Berlin, Germany

\*The German Gene Trap Consortium (<http://www.genetrap.de>)

**Running title:** Secretory gene trap resource

**Key words:** insertional mutagenesis, gene trap, ES cell

**§Corresponding author:**

Professor Harald von Melchner  
Department of Molecular Hematology  
University of Frankfurt Medical School  
Theodor-Stern-Kai 7  
60590 Frankfurt am Main, Germany  
Phone: 49-69-63016696  
FAX: 49-69-63016390  
e-mail: [melchner@em.uni-frankfurt.de](mailto:melchner@em.uni-frankfurt.de)  
web page: <http://www.vonmelchner.de>

**Figure 1:** Quantitative RT-PCR of wild type transcripts expressed in embryoid bodies derived from trapped ES cell lines. Transcript levels are normalized to corresponding wild type levels expressed in the parental cells after feeder cell removal (ES) (see Methods) or in the embryoid bodies (EB) derived from them. Gene specific primers were chosen in exons flanking the insertion sites (Suppl. Table 1 & Suppl. Figure 2). Results are means from triplicate reactions  $\pm$  SD.

**Figure 2:** Analysis of gene expression in trapped ES cell lines. Genes are shown as annotated in ENSEMBL. Gene trap insertions are indicated by vertical arrows. The positions of the primers in the exons flanking the insertion sites are marked by horizontal arrows. Since the mapping was based on GTSTs obtained by 5'RACE, the exact position of the insertion sites within introns could not be determined.

**Table 1:** Gene specific primers used for the analysis of gene expression in trapped ES cell lines.

| <b>Clone</b>                     | <b>Gene Symbol</b> | <b>Primer pair</b> | <b>Sense (s)</b>       | <b>Antisense (as)</b>   |
|----------------------------------|--------------------|--------------------|------------------------|-------------------------|
| <b>G024D09</b>                   | Idh3g              | RT01               | AAAGGCAATGCTCAAGCCAAC  | CCGCCACCATACTTAGCAGA'   |
| <b>G047F01</b>                   | Tmem32             | RT02               | CCGTCTACCTGGCCGACTTG   | AATCACGCCAAACACCATTC'   |
| <b>G049B05</b>                   | Ndufa1             | RT03               | GGCTTGTAGGTGTCGGGCTTT  | AACTGCAAAGGCCAGAAGTGTC' |
| <b>G067H01</b><br><b>P086B06</b> | 2610529C09<br>Rik  | RT04               | GCCAAGGTGGTTCTGGTCTGT  | CGACGGAACTTGTCTCCATTCA  |
| <b>P071A12</b>                   | Pdha1              | RT05               | CACAGCATGAGTGACCCTGGA  | GGCAGCATCCTCGATTTCTT    |
| <b>P071D05</b>                   | Prdx4              | RT06               | GTGGACGAGACACTGCGTTT'  | GCTGGATCTGGGATTATTGTTT  |
| <b>P071F11</b>                   | Ndufb11            | RT07               | AGTGGCAGGAGGACCCAGAAC  | CACGAAGGTGGTCCCAAAGAC   |
| <b>P072A05</b>                   | Atp6ap2            | RT08               | ATGGTGGGAACGCAGTGGTAG' | GGGACTTTGGGTGTTCTCTTG   |
| <b>P076F03</b>                   | Gla                | RT09               | GGAGATTGTTGAAGTCGCTGGA | CGCAGATCGTTGGACATGAGT   |
